# Supplementary material
Source: Springer Nature journal article supplement (https://www.springermedizin.de/resource/supplementary/12958_2007_397_MOESM2_ESM.pdf/9567794)
Supplement: MOESM2 [file 9567794]

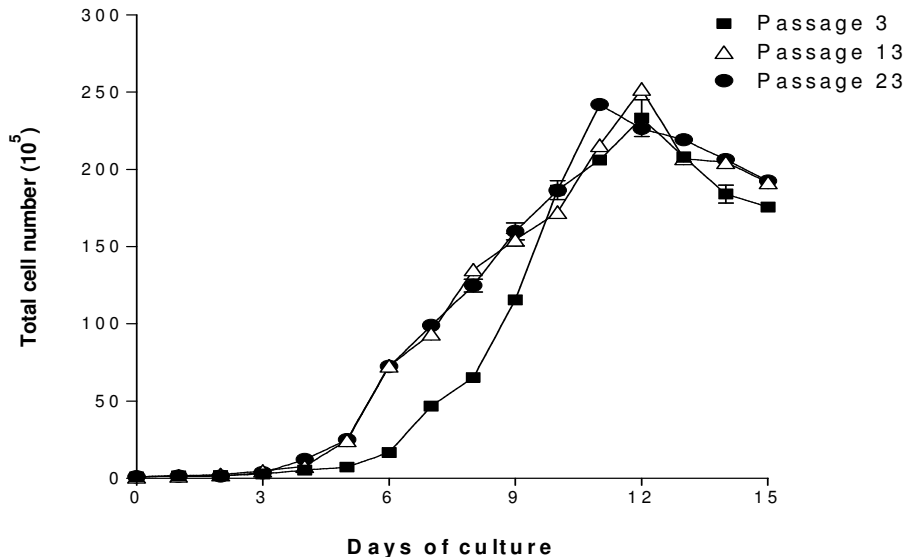

| TOV-1078D    |                        |                                |                                             |
|--------------|------------------------|--------------------------------|---------------------------------------------|
| Passage P76+ | Plating efficiency (%) | Population doubling time (hrs) | Saturation density (cells/cm <sup>2</sup> ) |
| 3            | 89,5                   | 17,6                           | 93,2 X 10 <sup>4</sup>                      |
| 13           | 95                     | 14,3                           | 100,8 X 10 <sup>4</sup>                     |
| 23           | 98                     | 13,8                           | 96,8 X 10 <sup>4</sup>                      |
